# Supplementary material for: Chromosome-scale genome assembly of diploid halophyte Thinopyrum bessarabicum excludes J genome from polyploid Thinopyrum ancestry
Source: bioRxiv preprint, doi:10.64898/2026.05.20.726494, version 1 (2026-05-21)
Supplement: Supplementary Tables [file 726494_file03.xlsx]

## Sheet: Table S1
	Supplementary Table 1. Statistics for PacBio HiFi long-read sequencing data generated across four SMRT cells on the PacBio Revio platform. For each cell, the number of sequences, total base pairs, minimum read length, N50 read length, maximum read length, and median Phred quality score are reported.
	Cell	num_seqs	sum_len(bp)	min_len(bp)	N50_len(bp)	max_len(bp)	median_Phred	ENA Accession	BAM File size (Gb)
	1	4956046	84587388448	69	17287	62688	34.698	ERR16096356	166.765
	2	5248105	88814800501	80	17164	57249	33.401	ERR16096358	319.865
	3	3364438	46900000000	88	14268	50764	36.716	ERR16096354	49.0798
	4	5446938	91900000000	94	17024	61832	33.958	ERR16096359	330.232
	Total	19015527	312202188949

## Sheet: Table S2
	Supplementary Table 2. Statistics for Hi-C chromatin conformation capture sequencing data used for scaffolding the Th. bessarabicum genome assembly. Reported metrics include raw read counts, total data volume (Gb), effective read percentage, error rate, Q20 and Q30 percentages, and GC content. Hi-C libraries were sequenced on an Illumina NovaSeqX Plus platform (2 × 150 bp paired-end).
	Sample	Raw reads	Raw data	Effective(%)	Error(%)	Q20(%)	Q30(%)	GC(%)	Lane Raw Base(G)	ENA Accession
	Thbess712	4414131946	662.12	100	0.01	96.81	91.8	48.27	720.72	ERR16098021

## Sheet: Table S3
	Supplementary Table 3. Per-chromosome lengths, scaffold composition, and GC content of the Th. bessarabicum J genome pseudomolecules and unanchored scaffolds. Length is given in base pairs. The number of contigs contributing to each pseudomolecule and the GC percentage are reported.
	Chromosome/Scaffolds	Length_bp	No. of contigs	GC%
	Chr1J*	750316659	17	45.91
	Chr2J	946002307	22	45.83
	Chr3J	848705358	22	45.7
	Chr4J	754332359	24	46.23
	Chr5J	792792867	17	45.7
	Chr6J	727325497	30	45.69
	Chr7J	932989118	20	45.65
	Unplaced	120926152	494	47.14
	Total	5873390317	646
	*Chr1J includes the two unlocalised scaffolds Chr1J_unloc_1 and Chr1J_unloc_2

## Sheet: Table S4
	Supplementary Table 4. Assembly statistics for the Th. bessarabicum nuclear genome. Summary metrics for the final chromosome-scale pseudomolecule assembly, including scaffold and contig counts, total assembly length, N50 and L50 values for both scaffolds and contigs, largest scaffold size, anchored sequence length, GC content, and number of sequence gaps.
	Metric	Value
	# scaffolds	502
	Total scaffold length	5873390317
	Average scaffold length	1.17e+07
	Scaffold N50	792792867
	Scaffold auN	8.12586e+08
	Scaffold L50	4
	Largest scaffold	946002307
	Smallest scaffold	13353
	# contigs	646
	Total contig length	5873372717
	Average contig length	9.09191e+06
	Contig N50	154753986
	Contig auN	1.63126e+08
	Contig L50	12
	Largest contig	348478471
	Smallest contig	13353
	# gaps in scaffolds	144
	Total gap length in scaffolds	17600
	Average gap length in scaffolds	122.22
	Gap N50 in scaffolds	100
	Gap auN in scaffolds	136.36
	Gap L50 in scaffolds	56
	Largest gap in scaffolds	200
	Smallest gap in scaffolds	100
	Base composition (A:C:G:T)	1591757274:1344245810:1344420427:1592949206
	GC content %	45.78
	# soft-masked bases	0
	# segments	646
	Total segment length	5873372717
	Average segment length	9.09191e+06
	# gaps	144
	# paths	502

## Sheet: Table S5
	Supplementary Table 5. Assembly statistics for the Th. bessarabicum chloroplast and mitochondrial genomes. Organelle genomes were assembled independently using the Oatk pipeline from PacBio HiFi reads. Length in base pairs, GC content, and circularity status are reported for each organelle.
	Organelle	Length (bp)	GC rate (%)	Circular
	chloroplast	135024	38.33	Yes
	mitochondrion	401710	44.48	No

## Sheet: Table S6
	Supplementary Table 6. Repetitive element content of the Th. bessarabicum J genome. Comprehensive classification of repetitive DNA identified using RepeatModeler and RepeatMasker with a curated Embryophyta repeat database supplemented by a custom de novo repeat library. Element classes are listed with their total masked length in base pairs and percentage of the total genome assembly.
	Type		Length	%
	SINEs		3458977	0.06
	LINEs		52397146	0.89
	LTR elements:		3424967746	58.31
		Copia	883011367	15.03
		Gypsy	1991705282	33.91
		Other	550251097	9.37
	DNA elements		746488438	12.71
	Unclassified		373365308	6.36
	Small RNA		12062938	0.21
	Satellites		105321917	1.79
	Simple repeats		16015927	0.27
	Total		4734078397	80.6

## Sheet: Table S7
	Supplementary Table 7. Statistics for Illumina RNA-Seq data generated from six tissue samples of Th. bessarabicum. Tissues sampled were seedlings at the three-leaf stage (dawn and dusk), roots, flag leaves, spikes, and developing grains. For each sample and sequencing lane, raw read counts, total data volume, effective read percentage, error rate, Q20 and Q30 quality percentages, and GC content a…
	Tissue	Sample	Library_Flowcell_Lane	Raw reads	Raw data	Effective(%)	Error(%)	Q20(%)	Q30(%)	GC(%)	ENA Accession
	Seedling (dawn)	bess_Ypl_AM	EKRN250001434-1A_22LJ3MLT4_L2	83289482	67.2	99.27	0.01	98.96	97.02	53.9	ERR17035462
	Seedling (dawn)	bess_Ypl_AM	EKRN250001434-1A_22LJ7MLT4_L8	364604404		99.28	0.01	98.89	96.77	53.81	ERR16097625
	Seedling (dusk)	bess_Ypl_PM	EKRN250001435-1A_22LJ7MLT4_L7	463448070	69.5	98.85	0.01	98.95	97.03	51.02	ERR16097500
	Young roots	bess_RT	EKRN250001436-1A_22LJ3MLT4_L1	138458804	69.5	99.06	0.01	99.19	97.6	52.36	ERR16097858
	Young roots	bess_RT	EKRN250001436-1A_22LJ7MLT4_L7	324772910		98.99	0.01	98.93	96.94	52.37	ERR16097859
	Spike	bess_Spk	EKRN250001437-1A_22LJ7MLT4_L7	455252638	68.3	99.22	0.01	98.95	96.99	51.41	ERR16097860
	Flag leaf	bess_Flg	EKRN250001438-1A_22LJ7MLT4_L7	258256806	61.9	99.22	0.01	98.89	96.82	52.6	ERR16097855
	Flag leaf	bess_Flg	EKRN250001438-1A_22LJ3MLT4_L1	154555758		99.28	0.01	99.19	97.59	52.54	ERR16097857
	Grains	bess_Grn	EKRN250001439-1A_22LJ3YLT4_L1	583289676	87.5	95.52	0.01	98.55	95.92	53.22	ERR16097856

## Sheet: Table S8
	Supplementary Table 8. Statistics for PacBio Iso-Seq full-length transcript sequencing generated from a pooled sample of six Th. bessarabicum tissues. Tissues included seedlings (dawn and dusk), roots, flag leaves, spikes, and developing grains. Read number, total bases, maximum read length, mean read length, and N50 read length are reported.
	Tissue	Sample	Read_Number	Read_base	Read_length(max)	Read_length(mean)	Read_length(N50)	ENA Accession
	Pool of seedling (dawn & dusk), roots, flag leaf, spike and grains	bess_Pool	90574248	128366812952	10230	1417	1471	ERR16097018

## Sheet: Table S9
	Supplementary Table 9. Species and genome assemblies used for cross-species protein alignment during genome annotation. Predicted proteomes from ten related grass species were aligned to the Th. bessarabicum genome using the REAT Homology workflow to provide homology evidence for gene model prediction. NCBI RefSeq assembly accessions and species names are listed.
	NCBI RefSeq ID	Species
	GCF_000003195.3	Sorghum bicolor
	GCF_000005505.3	Brachypodium distachyon
	GCF_000263155.2	Setaria italica
	GCF_001433935.1	Oryza sativa
	GCF_002162155.2	Triticum dicoccoides
	GCF_002211085.1	Panicum hallii
	GCF_002575655.2	Aegilops tauschii subsp. strangulata
	GCF_016808335.1	Panicum virgatum
	GCF_902167145.1	Zea mays
	GCF_904849725.1	Hordeum vulgare

## Sheet: Table S10
	Supplementary Table 10. Summary statistics for gene models in the Th. bessarabicum annotation. For each structural feature (gene, transcript, CDS, exon, intron, UTR), descriptive statistics are reported including total count, mean, mode, minimum, maximum, and selected quantiles (1st, 5th, 10th, 25th, 50th, 75th, 90th, 95th, 99th percentile). Statistics cover all biotype categories across the comp…
	Stat	Total	Average	Mode	Min	0.01	0.05	0.1	0.25	Median	0.75	0.9	0.95	0.99	Max
	Number of genes	114793	NA	NA	NA	NA	NA	NA	NA	NA	NA	NA	NA	NA	NA
	Number of genes (coding)	112087	NA	NA	NA	NA	NA	NA	NA	NA	NA	NA	NA	NA	NA
	Number of monoexonic genes	34532	NA	NA	NA	NA	NA	NA	NA	NA	NA	NA	NA	NA	NA
	Transcripts per gene	150167	1.31	1	1	1	1	1	1	1	1	2	3	6	36
	Coding transcripts per gene	146135	1.27	1	0	0	1	1	1	1	1	2	3	6	36
	CDNA lengths	234927793	1564.44	585	93	225	408	559	860	1343	2009	2836	3475	4996	19393
	CDNA lengths (mRNAs)	229723606	1572	1081	93	222	411	565	867	1351	2015	2846	3488	5025	19393
	CDS lengths	157448222	1048.49	0	0	0	213	276	471	837	1368	2079	2673	4080	18675
	CDS lengths (mRNAs)	NA	1077.42	669	72	186	246	309	498	864	1389	2103	2694	4101	18675
	CDS/cDNA ratio	NA	67.74	100	11	22	33	41	55	69	82	92	100	100	100
	Monoexonic transcripts	35449	1029.51	589	93	195	267	381	589	874	1304	1819	2285	3421	8319
	MonoCDS transcripts	42475	755.72	414	72	159	222	258	370	573	969	1449	1911	3006	5445
	Exons per transcript	653366	4.35	1	1	1	1	1	2	3	6	10	13	21	78
	Exons per transcript (mRNAs)	3862	4.38	1	1	1	1	1	2	3	6	10	13	21	78
	Exon lengths	NA	359.57	72	1	31	53	66	99	195	467	842	1176	2072	9448
	Exon lengths (mRNAs)	NA	358.86	72	1	31	53	66	99	195	467	842	1174	2070	9448
	Intron lengths	NA	688.5	87	20	69	77	82	95	158	567	1300	2398	9249	49876
	Intron lengths (mRNAs)	NA	688.21	87	20	69	77	82	95	157	563	1297	2394	9300	49876
	CDS exons per transcript	3195	3.91	1	0	0	1	1	1	2	5	9	12	20	78
	CDS exons per transcript (mRNAs)	3195	4.02	1	1	1	1	1	1	2	5	9	13	20	78
	CDS exon lengths	157448222	268.11	72	1	10	37	54	83	144	299	622	926	1791	9402
	CDS Intron lengths	300954592	682.25	86	19	68	75	80	93	146	523	1241	2382	9720	49875
	5'UTR exon number	146135	1.17	1	0	0	0	1	1	1	1	2	2	3	16
	3'UTR exon number	146135	1.05	1	0	0	0	1	1	1	1	2	2	2	15
	5'UTR length	28195008	192.94	0	0	0	0	19	47	114	261	457	611	1082	3595
	3'UTR length	44080376	301.64	0	0	0	0	32	118	246	414	617	778	1227	3436
	Stop distance from junction	NA	13.42	0	0	0	0	0	0	0	0	6	63	343	2586
	Intergenic distances	NA	46720.5	56	-59573	-5836	-723	88	1545	13079	58050	132503	200302	383551	5944799
	Intergenic distances (coding)	NA	47911.1	56	-59573	-5639	-625	121	1707	14030	59711	135352	204187	388940	5944799

[truncated: 11 more sheets: Table S11, Table S12, Table S13, Table S14, Table S15, Table S16, Table S17, Table S18, Table S19, Table S20, Table S21]
